# Supplementary material
Source: publisher figshare collection journal article supplement (https://frontiersin.figshare.com/ndownloader/files/25366136)

**PCA scores**

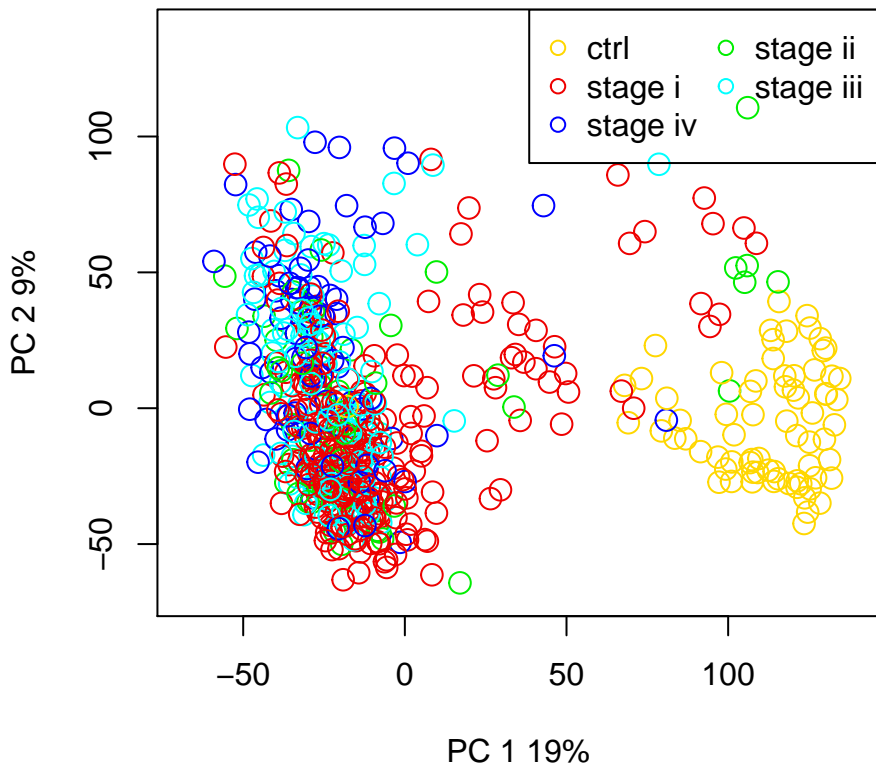

**PCA scores**

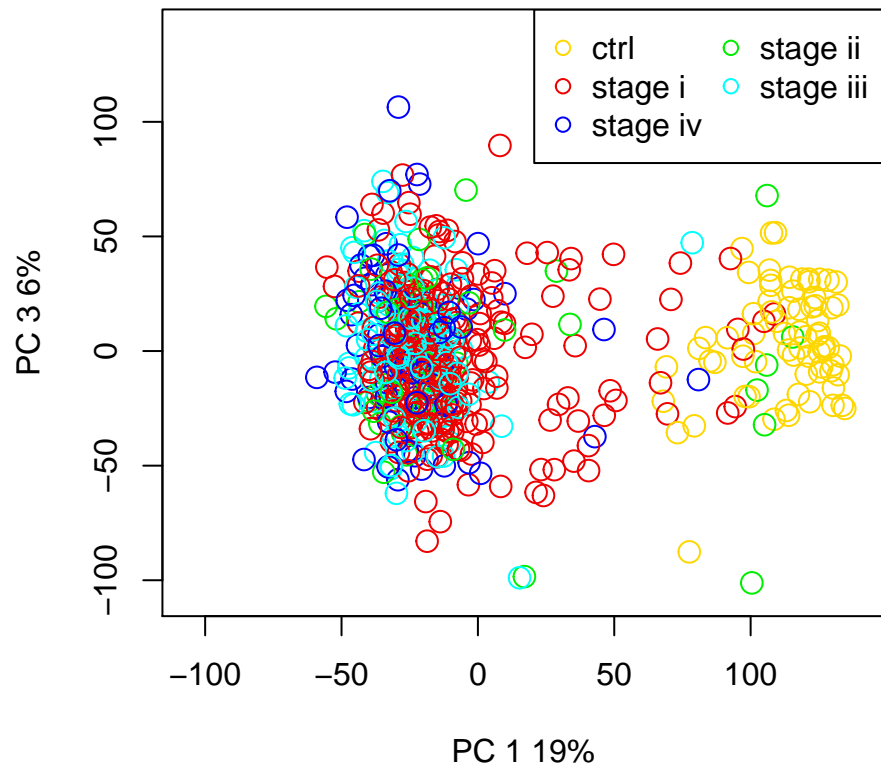

Supplement: Supplementary file 1 [file 25366136]

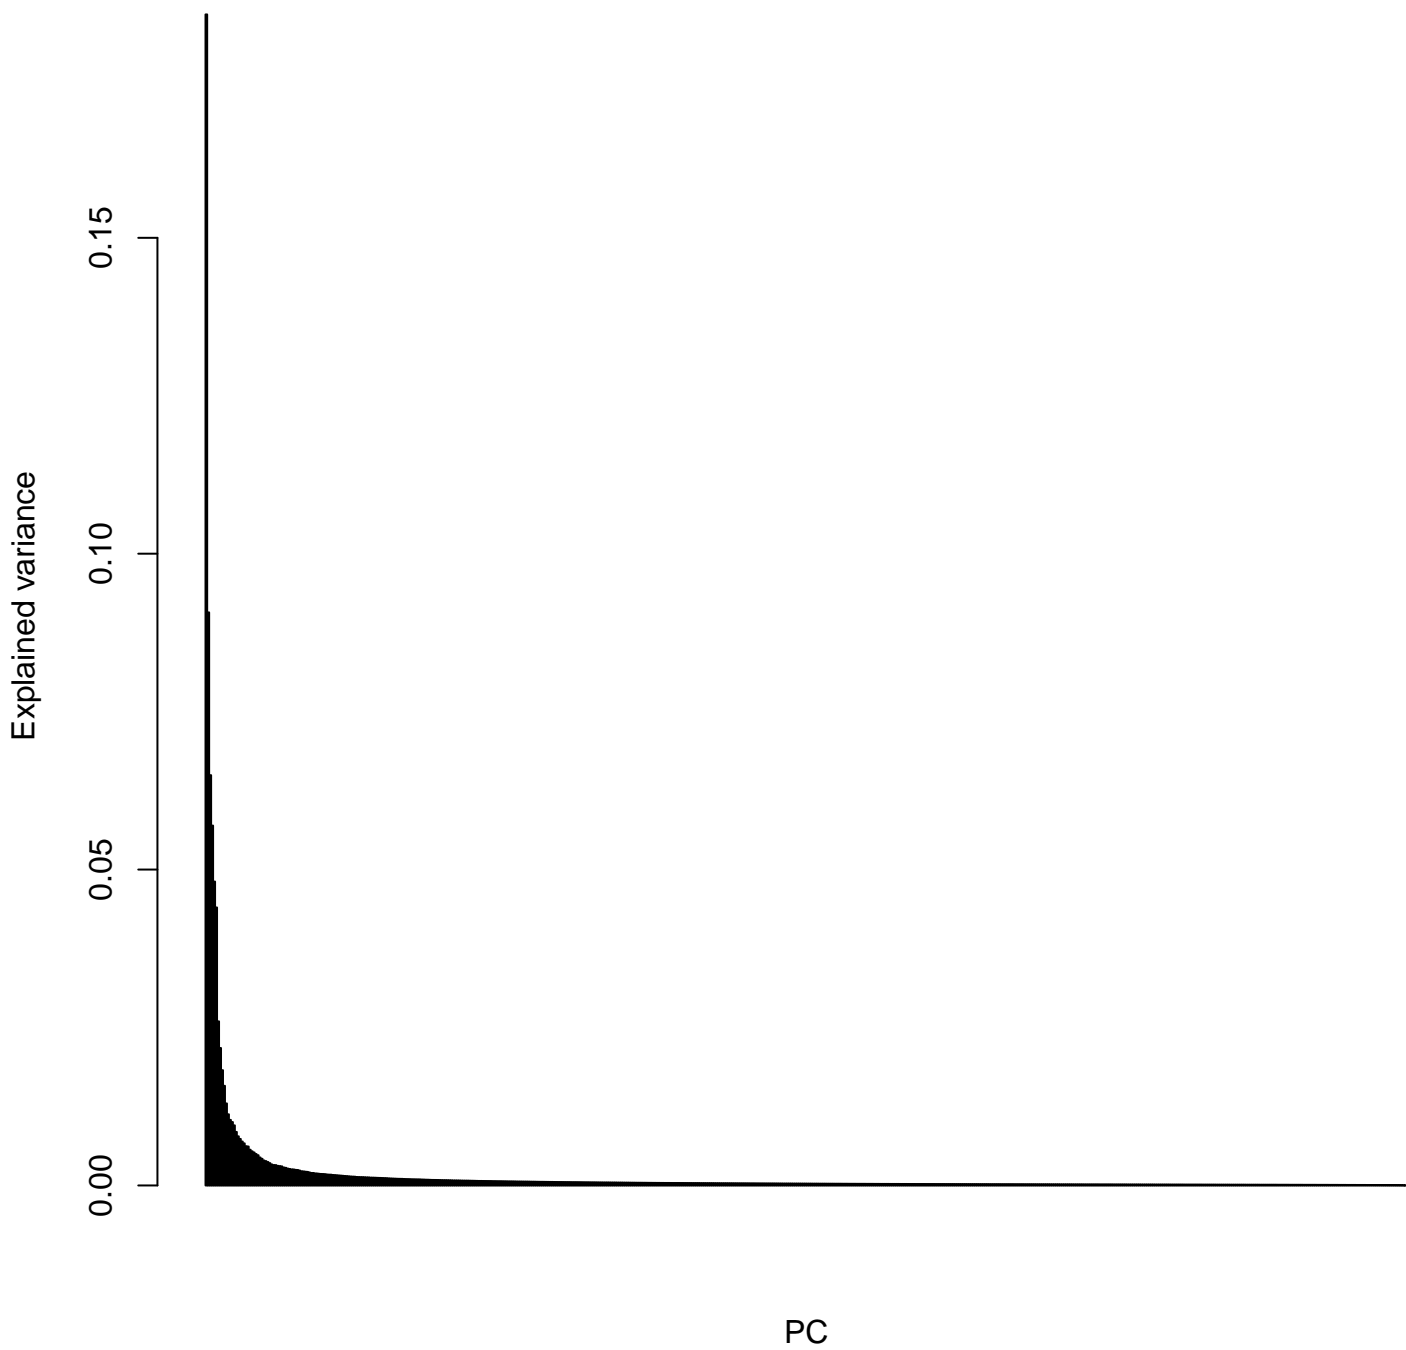

Supplement: Supplementary file 2 [file 25366136]

# PCA loadings

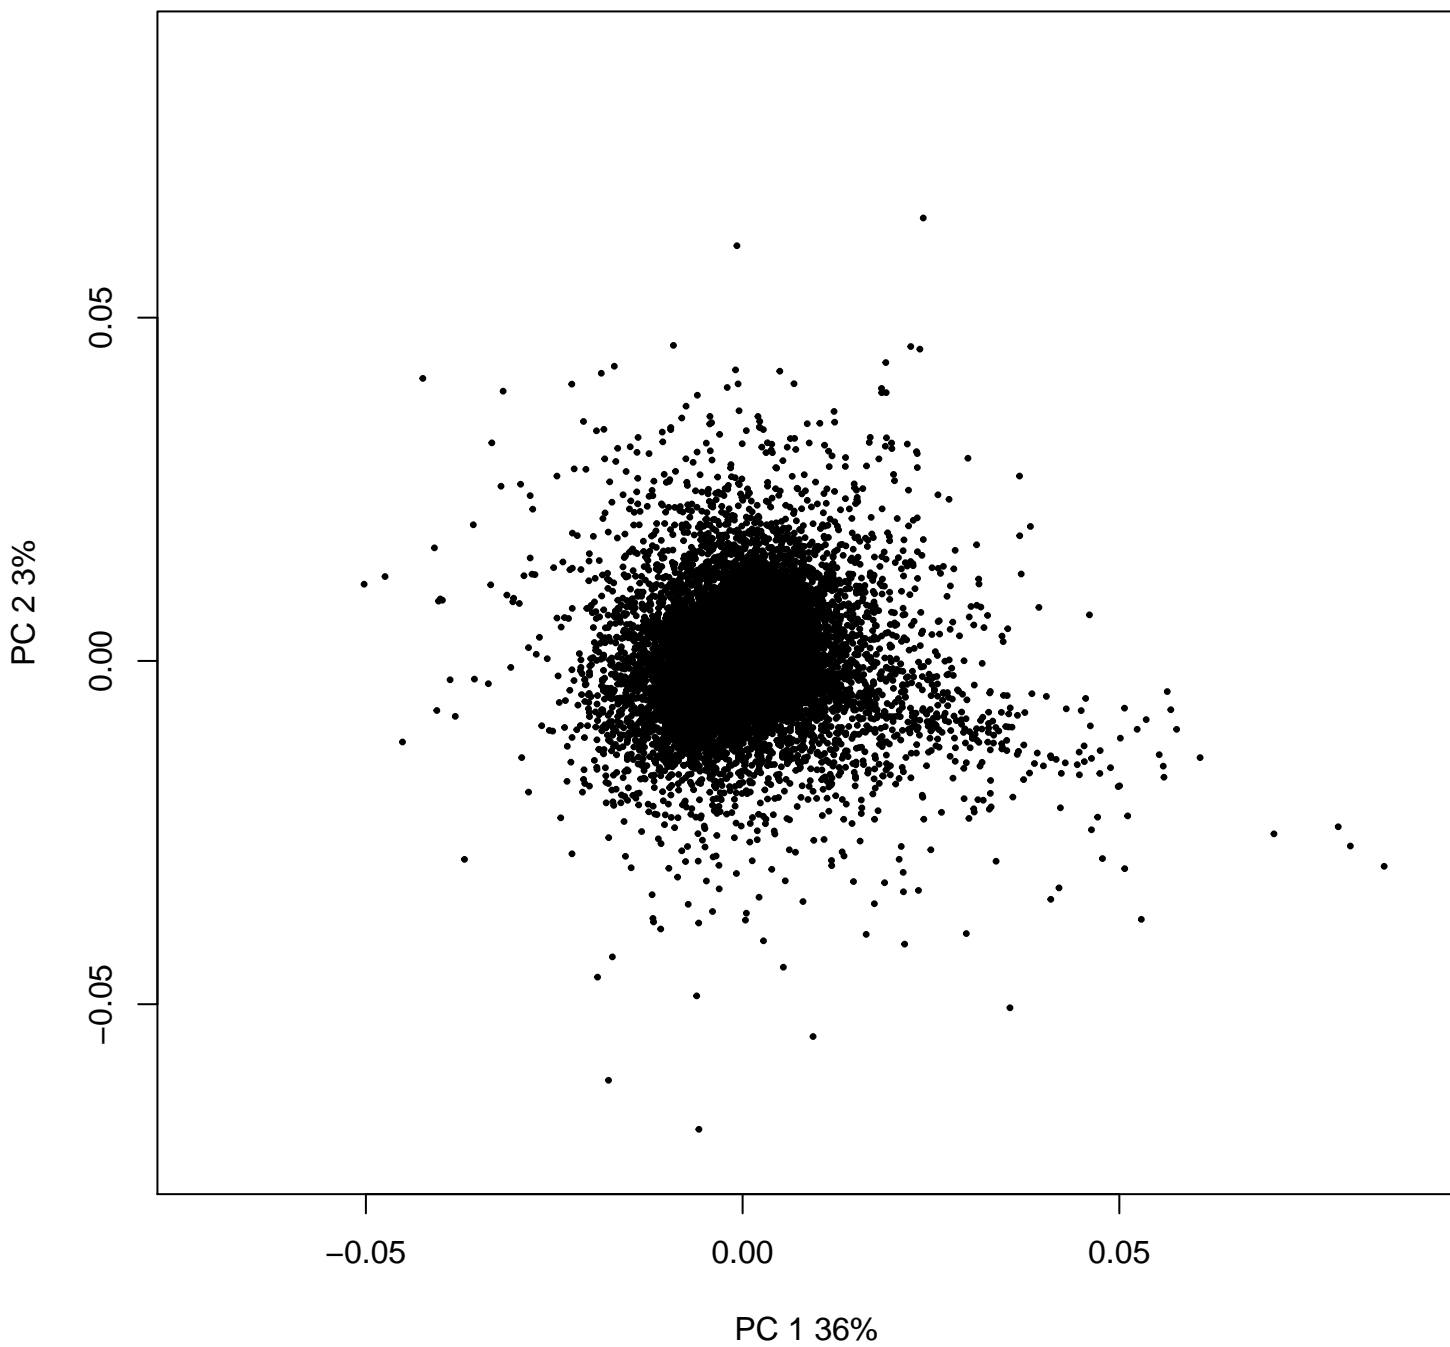

Supplement: Supplementary file 3 [file 25366136]

PCA scores

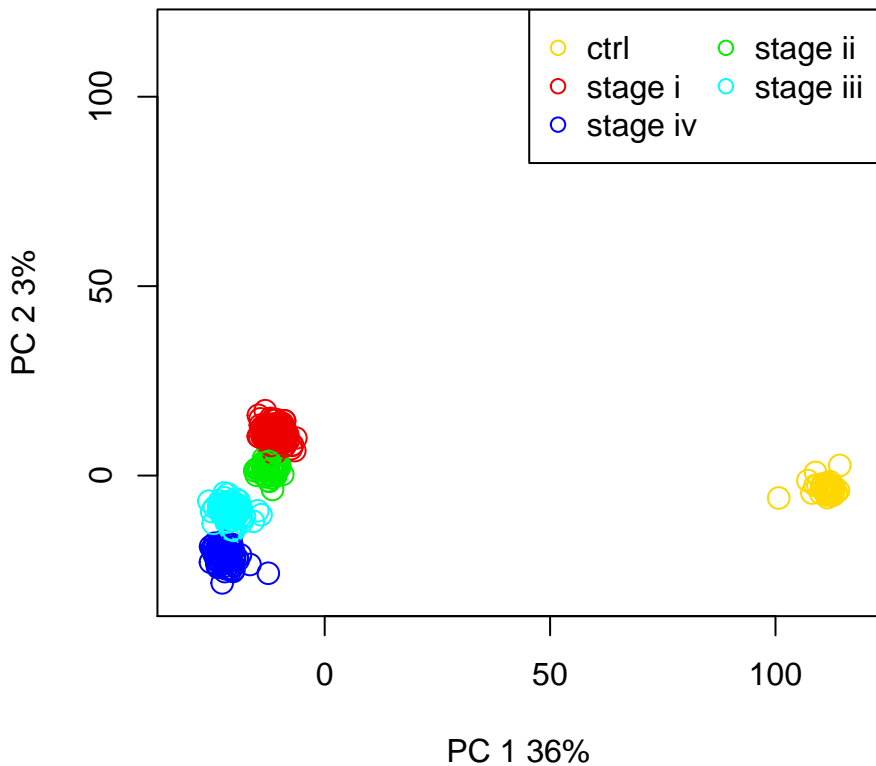

PCA scores

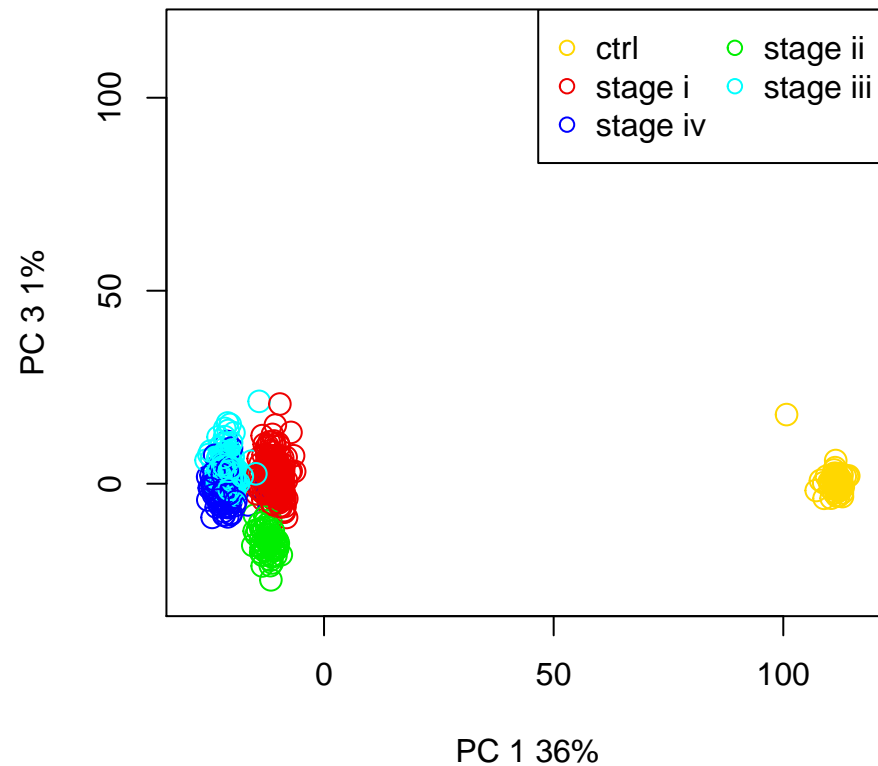

Supplement: Supplementary file 4 [file 25366136]

# PCA loadings

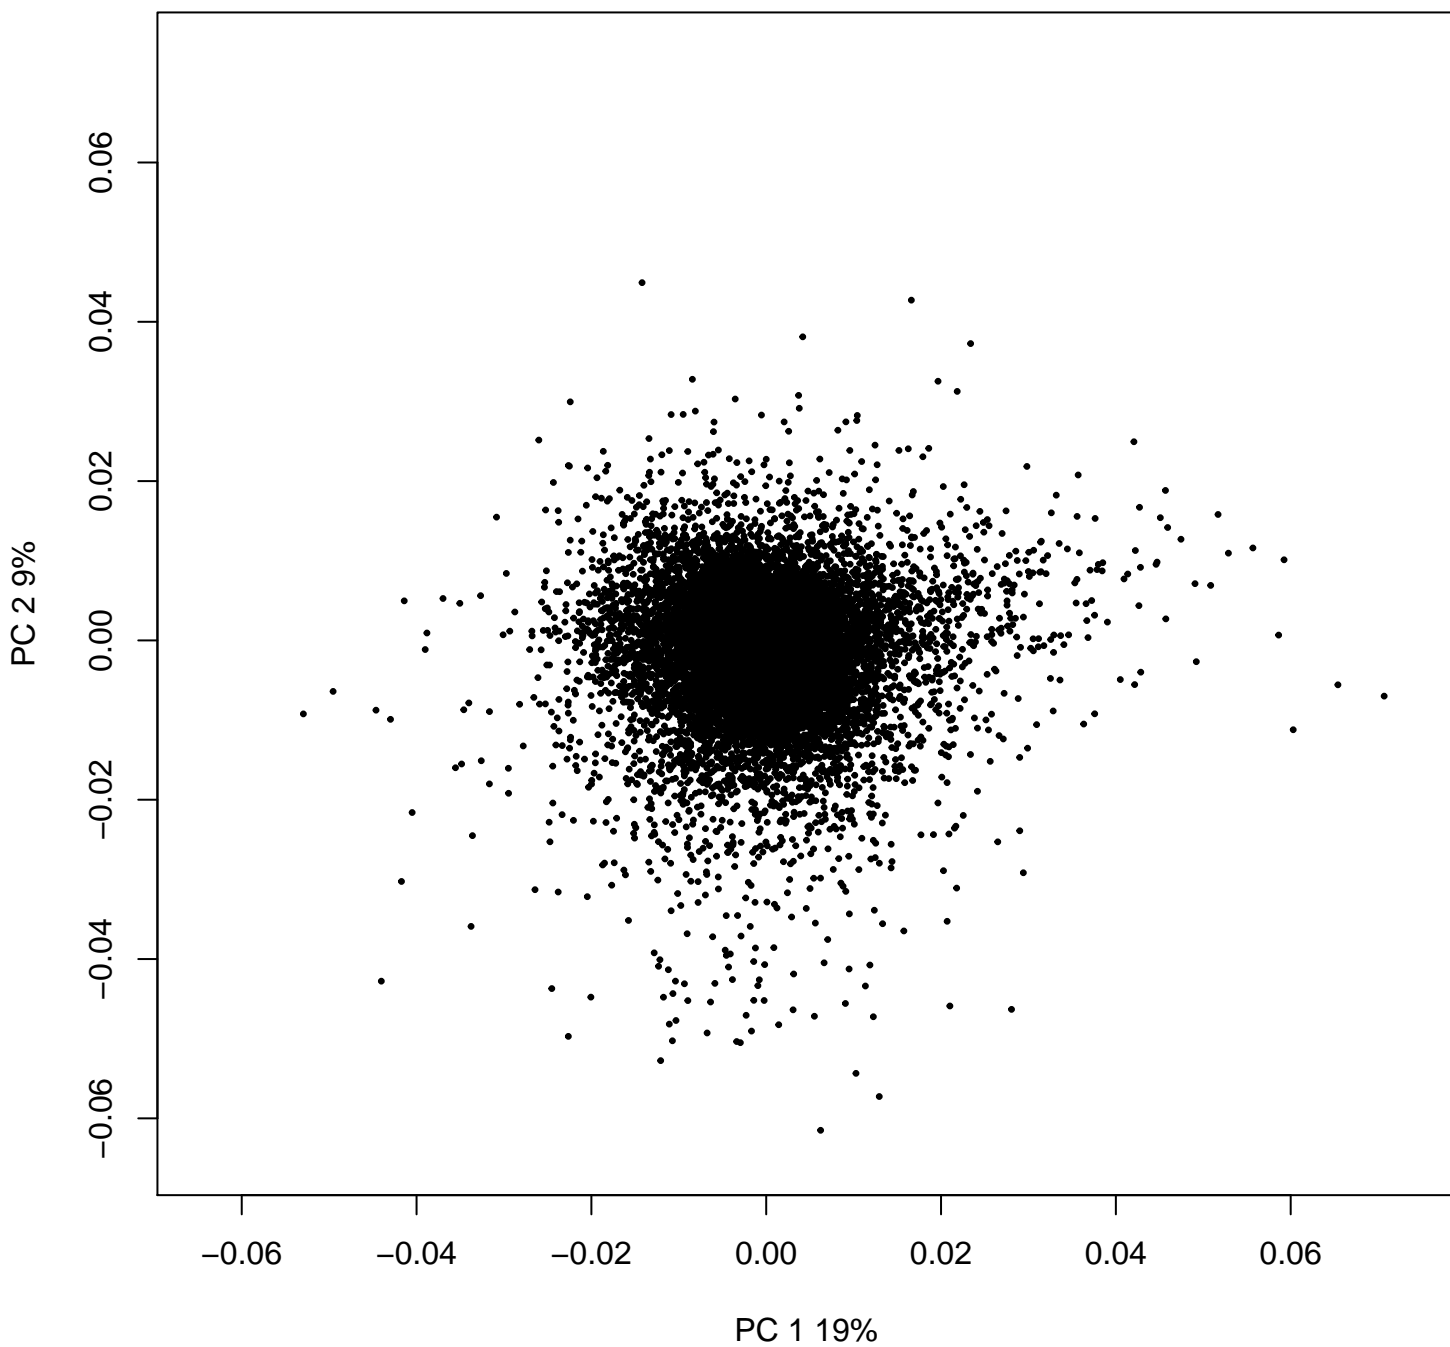

Supplement: Supplementary file 5 [file 25366136]

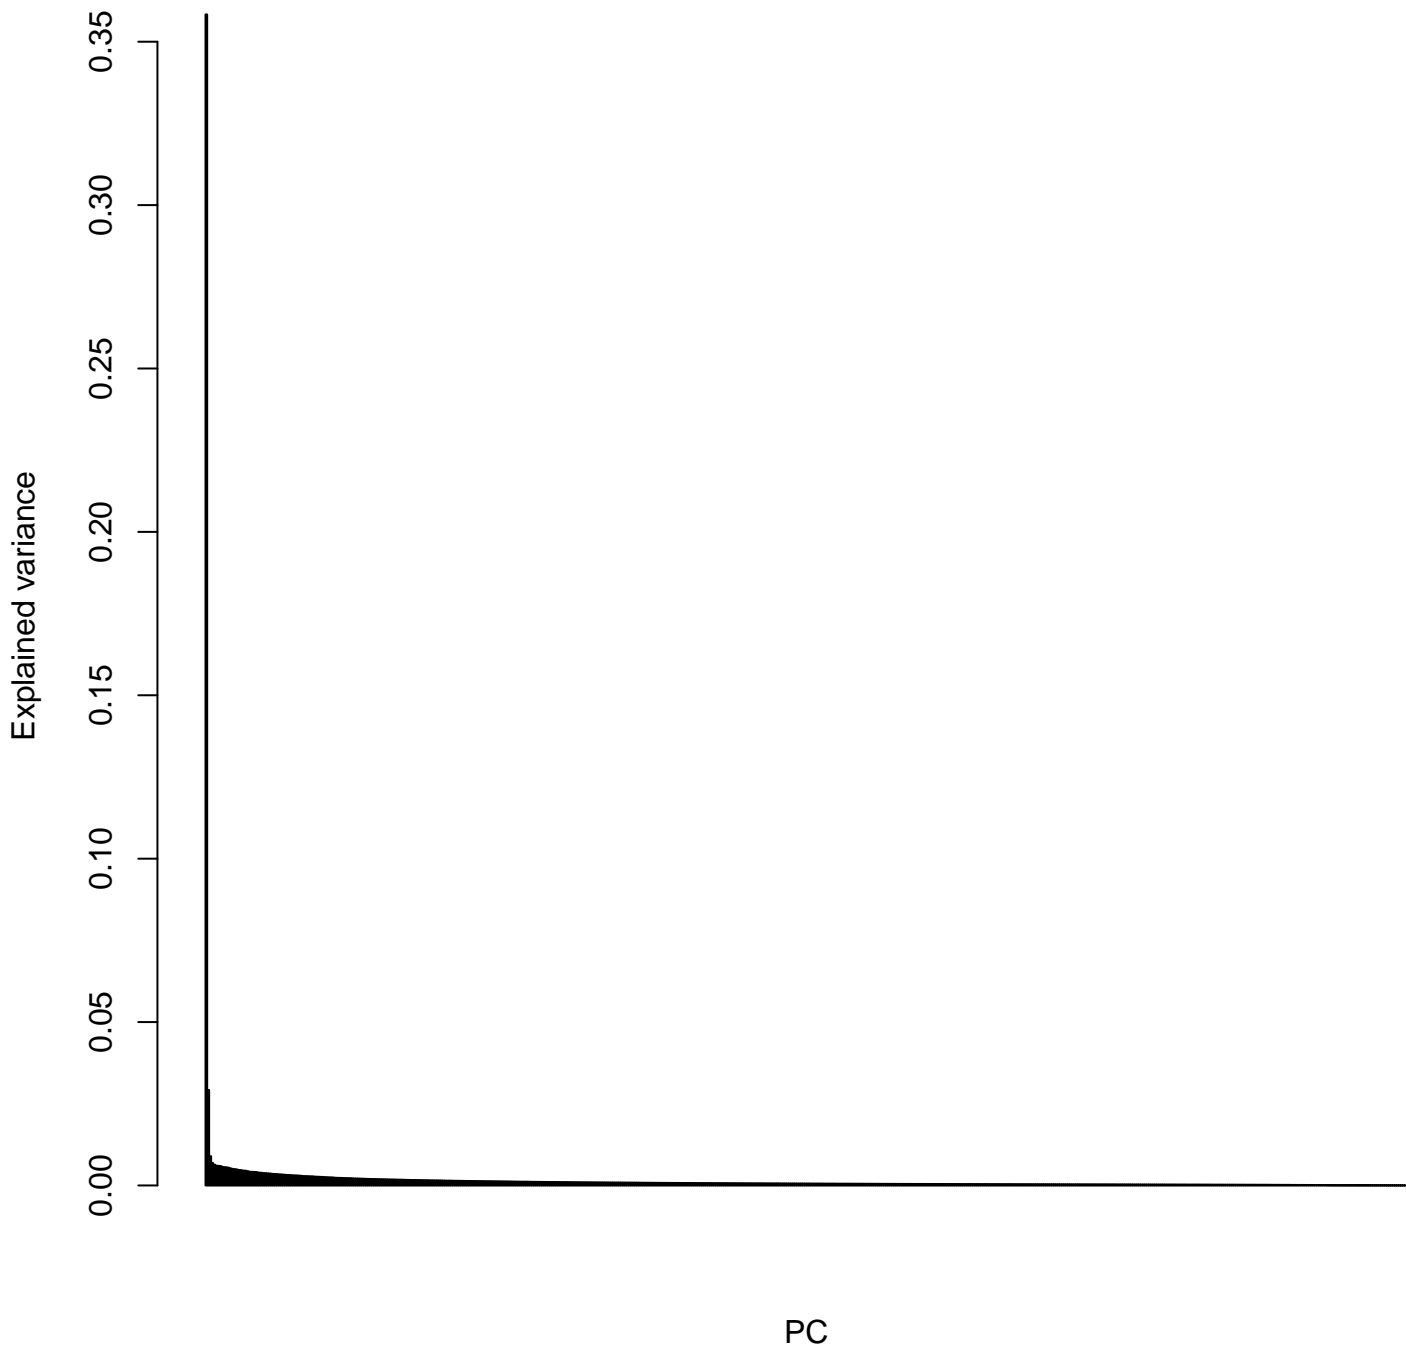

Supplement: Supplementary file 6 [file 25366136]
